# Supplementary material for: Impact of tumor microenvironment on efficacy of anti-CD19 CAR T cell therapy or chemotherapy and transplant in large B cell lymphoma
Source: PubMed Central journal article supplement (PMC10878966; doi:10.1038/s41591-023-02754-1), 2024-01-17

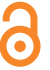

---

# Impact of tumor microenvironment on efficacy of anti-CD19 CAR T cell therapy or chemotherapy and transplant in large B cell lymphoma

---

In the format provided by the authors and unedited

## SUPPLEMENTARY APPENDIX

### Impact of Tumor Microenvironment on Efficacy of CD19 CAR T-Cell Therapy or Chemotherapy and Transplant in Large B-Cell Lymphoma

Locke\* and Filosto\*, et al.

\*Contributed equally to this work

#### Table of Contents

|                                                                                                                                                                                      |    |
|--------------------------------------------------------------------------------------------------------------------------------------------------------------------------------------|----|
| Supplementary Table 1. NanoString IO360™ panel gene signatures.....                                                                                                                  | 2  |
| Supplementary Table 2. Association of predictive biomarkers with grade ≥3 cytokine release syndrome following axi-cel treatment (safety analysis set).....                           | 4  |
| Supplementary Table 3. Association of predictive biomarkers with grade ≥3 neurological events following axi-cel treatment (safety analysis set).....                                 | 5  |
| Supplementary Table 4. Comparison of objective response per central assessment by CD19 protein expression (H-score as assessed by IHC) positivity and arm (safety analysis set)..... | 6  |
| Supplementary Table 5. Association of CCR7+CD45RA+ T cells (as a percentage of viable CD3+ cells) with tumor CD19 gene expression, B-cell GES, or SII (safety analysis set). ....    | 7  |
| Supplementary Table 6. Collection timing of pretreatment tumor biopsies by treatment arm. ....                                                                                       | 8  |
| Supplementary Table 7. Baseline characteristics of patients from ZUMA-7; based on data availability, as indicated. ....                                                              | 9  |
| Supplementary Table 8. Baseline characteristics of patients from ZUMA-1 Cohorts 1+2; based on data availability, as indicated. ....                                                  | 12 |
| Supplementary Figure 1. Nanostring IO360™ gene clustering reveals distinct TME immune contextures. ....                                                                              | 14 |
| Supplementary Figure 2. EFS and DOR by median of cluster 3 and cluster 4 and treatment arm. ....                                                                                     | 16 |
| Supplementary Figure 3. CD19 H-score correlated with CD19 gene expression and B-cell IO360™ signature.....                                                                           | 18 |
| Supplementary Figure 4. Gating strategy used to derive T cell phenotypes. ....                                                                                                       | 19 |
| Supplementary Figure 5. Logistic regression curves of responses by SPD. ....                                                                                                         | 20 |
| Supplementary Figure 6. Increased thresholds for tumor burden (by SPD) and LDH did not impact axi-cel EFS. ....                                                                      | 21 |
| Supplementary Figure 7. Principal Component Analysis of Gene Expression Derived Features Significantly Associated with Clinical Outcome.....                                         | 23 |

**Supplementary Table 1. NanoString IO360™ panel gene signatures.**

| Cluster                                         | Cell type signature, biological activity signature, or single gene signature | Gene name                                                                                                                                                                  |
|-------------------------------------------------|------------------------------------------------------------------------------|----------------------------------------------------------------------------------------------------------------------------------------------------------------------------|
| 1: B-Cell Lineage and Proliferation Index (BPI) | APM loss                                                                     | <b>B2M, TAP1, TAP2, TAPBP, HLA-A, HLA-B, HLA-C</b>                                                                                                                         |
|                                                 | B cells                                                                      | <i>BLK, CD19, MS4A1, TNFRSF17, FCRL2, FAM30A, PNOC, SPIB, TCL1A</i>                                                                                                        |
|                                                 | CD45                                                                         | <i>PTPRC</i>                                                                                                                                                               |
|                                                 | Glycolytic activity                                                          | <b>AKT1, HIF1A, SLC2A1, HK2, TPI1, ENO1, LDHA, PFKFB3, PFKM, GOT1, GOT2, GLUD1, HK1</b>                                                                                    |
|                                                 | JAK-STAT loss                                                                | <b>JAK1, JAK2, IFNGR1, IRF1, IFNGR2</b>                                                                                                                                    |
|                                                 | MSI predictor                                                                | <i>MLH1, MSH2, MSH6, PMS2, EPM2AIP1, RNLS, SFXN1, SMAP1, SREBF1, TTC30A, TYMS, WDR76, WNT11, EIF5AL1</i>                                                                   |
|                                                 | Proliferation                                                                | <i>MKI67, CEP55, KIF2C, MELK, CENPF, EXO1, ANLN, RRM2, UBE2C, CCNB1, CDC20</i>                                                                                             |
| 2: Stromal and Immunosuppressive Index (SII)    | Apoptosis                                                                    | <i>AXIN1, BAD, BAX, BBC3, BCL2L1</i>                                                                                                                                       |
|                                                 | Endothelial cells                                                            | <i>FAM124B, KDR, CLEC14A, CXorf36, ROBO4, MYCT1, CDH5, TIE1, BCL6B, PALMD, MMRN2</i>                                                                                       |
|                                                 | Hypoxia                                                                      | <i>BNIP3L, MXI1, ADM, PLOD2, P4HA1, ALDOC, SLC2A1, PDK1, P4HA2, BNIP3</i>                                                                                                  |
|                                                 | MAGE                                                                         | <i>MAGEA3/A6, MAGEA1, MAGEA12, MAGEA4, MAGEB2, MAGEC2, MAGEC1</i>                                                                                                          |
|                                                 | Mast cells                                                                   | <i>MS4A2, CPA3, HDC, TPSAB1/B2</i>                                                                                                                                         |
|                                                 | MMR loss                                                                     | <b>MLH1, PMS2, MSH2, MSH6</b>                                                                                                                                              |
|                                                 | Myeloid inflammatory                                                         | <i>CXCL1, CXCL3, CXCL2, CCL20, AREG, FOSL1, CSF3, PTGS2, IER3, IL6</i>                                                                                                     |
|                                                 | Stroma                                                                       | <i>FAP, COL6A3, ADAM12, OLFML2B, PDGFRB, LRRC32</i>                                                                                                                        |
| Single gene signatures                          | <i>ARG1, CD276 (B7-H3), NOS2, TGFB1</i>                                      |                                                                                                                                                                            |
| 3                                               | Dendritic cells                                                              | <i>CCL13, CD209, HSD11B1</i>                                                                                                                                               |
|                                                 | IFN downstream                                                               | <i>IFI16, IFI27, IFI35, IFIH1, IFIT1, IFIT2, IFITM1, IFITM2, IRF1, APOL6, TMEM140, PARP9, TRIM21, GBP1, DTX3L, PSMB9, OAS1, OAS2, ISG15, MX1, IFI6, IFIT3, IRF9, STAT2</i> |
|                                                 | IFN-γ                                                                        | <i>STAT1, CXCL9, CXCL10, CXCL11</i>                                                                                                                                        |
|                                                 | Immunoproteasome                                                             | <i>PSMB8, PSMB9, PSMB10</i>                                                                                                                                                |
|                                                 | Inflammatory chemokines                                                      | <i>CCL2, CCL3/L1, CCL4, CCL7, CCL8</i>                                                                                                                                     |
|                                                 | Macrophages                                                                  | <i>CD163, CD68, CD84, MS4A4A</i>                                                                                                                                           |

|   |                        |                                                                                                                                                                                                                                                                                                                                                                                                |
|---|------------------------|------------------------------------------------------------------------------------------------------------------------------------------------------------------------------------------------------------------------------------------------------------------------------------------------------------------------------------------------------------------------------------------------|
|   | MHC2                   | <i>HLA-DRB5, HLA-DPA1, HLA-DPB1, HLA-DQB1, HLA-DRA, HLA-DRB1, HLA-DMA, HLA-DOA</i>                                                                                                                                                                                                                                                                                                             |
|   | Myeloid                | <i>ITGAM, TLR4, IL1B, CSF1R, CSF3R, TLR2, TLR1, ITGAX, HCK, TLR8, SLC11A1, CD47, CD14, CLEC4E, CLEC7A, FCAR, FCN1, LILRA5, LILRB2, LYZ, NFAM1, P2RY13, S100A8, S100A9, SERPINA1, SIRPA, SIRPB2, TREM1, CLEC5A, CSF1, CYBB, FCGR1A, MARCO, NLRP3, FPR1, FPR3, CCL3/L1, DAB2, OLR1, C5AR1, <b>TREM2</b>, MRC1, CEBPB</i>                                                                         |
|   | Neutrophils            | <i>CSF3R, S100A12, CEACAM3, FCAR, FCGR3A/B, FPR1, SIGLEC5</i>                                                                                                                                                                                                                                                                                                                                  |
|   | NK cells               | <i>NCR1, XCL1/2</i>                                                                                                                                                                                                                                                                                                                                                                            |
|   | NK CD56dim cells       | <i>IL21R, KIR2DL3, KIR3DL1, KIR3DL2</i>                                                                                                                                                                                                                                                                                                                                                        |
|   | Th1 cells              | <i>TBX21</i>                                                                                                                                                                                                                                                                                                                                                                                   |
|   | Treg                   | <i>FOXP3</i>                                                                                                                                                                                                                                                                                                                                                                                   |
|   | Single gene signatures | <i>IL10, CD274 (PD-L1), TIGIT</i>                                                                                                                                                                                                                                                                                                                                                              |
| 4 | APM                    | <i>B2M, TAP1, TAP2, TAPBP, HLA-A, HLA-B, HLA-C</i>                                                                                                                                                                                                                                                                                                                                             |
|   | CD8 T cells            | <i>CD8A, CD8B</i>                                                                                                                                                                                                                                                                                                                                                                              |
|   | Cytotoxic cells        | <i>CTSW, GNLY, GZMA, GZMB, GZMH, KLRB1, KLRD1, KLRK1, PRF1, NKG7</i>                                                                                                                                                                                                                                                                                                                           |
|   | Cytotoxicity           | <i>GZMA, GZMB, GZMH, PRF1, GNLY</i>                                                                                                                                                                                                                                                                                                                                                            |
|   | Exhausted CD8          | <i>CD244, EOMES, LAG3, PTGER4</i>                                                                                                                                                                                                                                                                                                                                                              |
|   | Lymphoid               | <i>CXCL10, CXCR3, CX3CL1, PRF1, GZMK, GZMB, CD27, IL2RG, KLRK1, CTLA4, GZMH, CD3D, KLRB1, KLRD1, LCK, CD5, IRF4, CD8A, CD38, EOMES, GZMM, GNLY, IFITM1, IDO1, <b>MS4A1</b>, GZMA, CD2, CD3E, CD3G, CD40LG, CD6, CD7, <b>CD79A</b>, CD8B, CXCL11, CXCL13, CXCL9, HLA-DOB, IFNG, LAG3, LY9, PDCD1, TBX21, TIGIT, ZAP70, SLAMF7, CD96, PVR, STAT1, JAK1, JAK2, STAT2, IRF9, IGF2R, CD48, ICOS</i> |
|   | T cells                | <i>CD3D, CD3E, CD3G, CD6, SH2D1A, TRAT1</i>                                                                                                                                                                                                                                                                                                                                                    |
|   | TIS                    | <i>CCL5, CD27, CD274, CD276, CD8A, CMKLR1, CXCL9, CXCR6, HLA-DQA1, HLA-DRB1, HLA-E, IDO1, LAG3, NKG7, PDCD1LG2, PSMB10, STAT1, TIGIT</i>                                                                                                                                                                                                                                                       |
|   | Single gene signatures | <i>CTLA4, IDO1, PDCD1LG2 (PD-L2), PDCD1 (PD-1)</i>                                                                                                                                                                                                                                                                                                                                             |

Genes that are negatively associated with the cluster in which they are found are shown in **bold**. All other genes demonstrated a positive association with the cluster. APM, antigen processing machinery; IFN, interferon; JAK, Janus kinase; MAGE, melanoma antigen gene; MHC, major histocompatibility complex; MMR, mismatch repair; MSI, microsatellite instability; NK, natural killer; STAT, signal transducer and activator of transcription; Th1, T helper type 1; TIS, tumor inflammation signature; Treg, regulatory T cells.

**Supplementary Table 2. Association of predictive biomarkers with grade  $\geq 3$  cytokine release syndrome following axi-cel treatment (safety analysis set).**

|                             | Axi-Cel<br>(N=170)         |                                   | P value |
|-----------------------------|----------------------------|-----------------------------------|---------|
|                             | Grade $\geq 3$<br>(N=11)   | Grade $\leq 2$ or None<br>(N=159) |         |
| <b>SII</b>                  |                            |                                   |         |
| n                           | 11                         | 123                               | 0.2335  |
| Mean (SD)                   | 23.53 (35.73)              | 18.02 (11.46)                     |         |
| Median (Q1, Q3)             | 12.89 (10.89, 17.72)       | 14.97 (11.98, 19.54)              |         |
| Min, Max                    | 8.22, 130.88               | 6.63, 89.68                       |         |
| <b>B-cell score</b>         |                            |                                   |         |
| n                           | 11                         | 123                               | 0.3640  |
| Mean (SD)                   | 623.08 (520.68)            | 466.59 (288.17)                   |         |
| Median (Q1, Q3)             | 566.13 (225.35, 635.61)    | 432.03 (252.83, 612.26)           |         |
| Min, Max                    | 67.88, 2033.85             | 38.51, 1937.53                    |         |
| <b>CD19 H-score</b>         |                            |                                   |         |
| n                           | 10                         | 139                               | 0.7469  |
| Mean (SD)                   | 152.00 (109.93)            | 143.35 (81.61)                    |         |
| Median (Q1, Q3)             | 165.00 (70.00, 270.00)     | 140.00 (85.00, 200.00)            |         |
| Min, Max                    | 0.00, 280.00               | 0.00, 300.00                      |         |
| <b>CD19 gene expression</b> |                            |                                   |         |
| n                           | 11                         | 123                               | 0.3902  |
| Mean (SD)                   | 2910.90 (3174.21)          | 1900.49 (1285.45)                 |         |
| Median (Q1, Q3)             | 2177.57 (1045.75, 3863.80) | 1685.21 (850.23, 2706.14)         |         |
| Min, Max                    | 77.41, 11780.56            | 46.50, 6914.38                    |         |

Axi-cel, axicabtagene ciloleucel; max, maximum; min, minimum; Q1, quarter 1; Q3, quarter 3; SD, standard deviation; SII, Stromal and Immunosuppressive Index.

**Supplementary Table 3. Association of predictive biomarkers with grade  $\geq 3$  neurological events following axi-cel treatment (safety analysis set).**

|                             | Axi-Cel<br>(N=170)        |                                   | P value |
|-----------------------------|---------------------------|-----------------------------------|---------|
|                             | Grade $\geq 3$<br>(N=36)  | Grade $\leq 2$ or None<br>(N=134) |         |
| <b>SII</b>                  |                           |                                   |         |
| n                           | 26                        | 108                               | 0.5158  |
| Mean (SD)                   | 24.24 (27.62)             | 17.08 (9.15)                      |         |
| Median (Q1, Q3)             | 15.46 (12.19, 18.57)      | 14.45 (11.78, 19.00)              |         |
| Min, Max                    | 8.22, 130.88              | 6.63, 54.30                       |         |
| <b>B-cell score</b>         |                           |                                   |         |
| n                           | 26                        | 108                               | 0.6628  |
| Mean (SD)                   | 478.53 (382.52)           | 479.66 (296.88)                   |         |
| Median (Q1, Q3)             | 494.58 (250.91, 574.44)   | 455.00 (268.37, 627.08)           |         |
| Min, Max                    | 67.88, 2033.85            | 38.51, 1937.53                    |         |
| <b>CD19 H-score</b>         |                           |                                   |         |
| n                           | 33                        | 116                               | 0.2210  |
| Mean (SD)                   | 127.58 (76.16)            | 148.59 (85.04)                    |         |
| Median (Q1, Q3)             | 130.00 (70.00, 190.00)    | 142.50 (90.00, 220.00)            |         |
| Min, Max                    | 0.00, 270.00              | 0.00, 300.00                      |         |
| <b>CD19 gene expression</b> |                           |                                   |         |
| n                           | 26                        | 108                               | 0.3518  |
| Mean (SD)                   | 1981.44 (2276.15)         | 1983.92 (1308.26)                 |         |
| Median (Q1, Q3)             | 1550.91 (801.44, 2630.19) | 1795.93 (996.47, 2801.72)         |         |
| Min, Max                    | 77.41, 11780.56           | 46.50, 6914.38                    |         |

Axi-cel, axicabtagene ciloleucel; max, maximum; min, minimum; Q1, quarter 1; Q3, quarter 3; SD, standard deviation; SII, Stromal and Immunosuppressive Index.

**Supplementary Table 4. Comparison of objective response per central assessment by CD19 protein expression (H-score as assessed by IHC) positivity and arm (safety analysis set).**

|                    | CD19 H-score positive<br>(N=268) |                |                | CD19 H-score negative<br>(N=25) |               |                |
|--------------------|----------------------------------|----------------|----------------|---------------------------------|---------------|----------------|
|                    | Axi-cel<br>(N=136)               | SOC<br>(N=132) | <i>P</i> value | Axi-cel<br>(N=13)               | SOC<br>(N=12) | <i>P</i> value |
| Response, n (%)    | 118 (86.8)                       | 70 (53.0)      | <.0001         | 11 (84.6)                       | 8 (66.7)      | 0.6299         |
| No response, n (%) | 18 (13.2)                        | 57 (43.2)      |                | 2 (15.4)                        | 3 (25.0)      |                |

Axi-cel, axicabtagene ciloleucel; SOC, standard of care.

**Supplementary Table 5. Association of CCR7+CD45RA+ T cells (as a percentage of viable CD3+ cells) with tumor CD19 gene expression, B-cell GES, or SII (safety analysis set).**

|                      | Axi-Cel<br>(N=170)           |                                        |                |
|----------------------|------------------------------|----------------------------------------|----------------|
|                      | Number of evaluable patients | Spearman correlation estimate (95% CI) | <i>P</i> value |
| CD19 gene expression | 132                          | -0.122 (-0.287, 0.050)                 | 0.1610         |
| B-cell score         | 132                          | -0.071 (-0.239, 0.101)                 | 0.4193         |
| SII                  | 132                          | 0.121 (-0.051, 0.286)                  | 0.1658         |

Axi-cel, axicabtagene ciloleucel; GES, gene expression signature; SII, Stromal and Immunosuppressive Index.



**Supplementary Table 6. Collection timing of pretreatment tumor biopsies by treatment arm.**

|                       | Axi-cel | SOC | Overall |
|-----------------------|---------|-----|---------|
| Before 1L (Diagnosis) | 44      | 49  | 93      |
| After 1L              | 90      | 70  | 160     |
| Unknown               | 0       | 3   | 3       |
| Biopsy not provided   | 36      | 46  | 82      |
| Total                 | 170     | 168 | 338     |

1L, first-line therapy; Axi-cel, axicabtagene ciloleucel; SOC, standard of care.

**Supplementary Table 7. Baseline characteristics of patients from ZUMA-7; based on data availability, as indicated.**

|                                                  | ZUMA-7                         |                  |                            |                  |                       |                  |
|--------------------------------------------------|--------------------------------|------------------|----------------------------|------------------|-----------------------|------------------|
|                                                  | Safety analysis set<br>(N=338) |                  | CD19 H-score set<br>N=293) |                  | IO360™ set<br>(N=256) |                  |
|                                                  | Axi-cel<br>(N=170)             | SOC<br>(N=168)   | Axi-cel<br>(N=149)         | SOC<br>(N=144)   | Axi-cel<br>(N=134)    | SOC<br>(N=122)   |
| Median age (range),<br>y                         | 58.5 (21,<br>80)               | 60.0 (29,<br>81) | 59.0<br>(21, 77)           | 60.0<br>(29, 81) | 57.5<br>(21, 77)      | 60.0<br>(29, 78) |
| ≥65 years, n (%)                                 | 49 (29)                        | 55 (33)          | 45 (30)                    | 49 (34)          | 37 (28)               | 40 (33)          |
| Male sex, n (%)                                  | 106 (62)                       | 120 (71)         | 95 (64)                    | 103 (72)         | 85 (63)               | 88 (72)          |
| Race, n (%)                                      |                                |                  |                            |                  |                       |                  |
| American Indian<br>or Alaska Native              | 0                              | 1 (1)            | 0                          | 1 (1)            | 0                     | 1 (1)            |
| Asian                                            | 11 (6)                         | 8 (5)            | 11 (7)                     | 8 (6)            | 8 (6)                 | 5 (4)            |
| Black or African<br>American                     | 9 (5)                          | 6 (4)            | 7 (5)                      | 6 (4)            | 8 (6)                 | 5 (4)            |
| Native Hawaiian<br>or Other Pacific<br>Islander  | 2 (1)                          | 1 (1)            | 2 (1)                      | 1 (1)            | 2 (1)                 | 1 (1)            |
| White                                            | 138 (81)                       | 145 (86)         | 120 (81)                   | 125 (87)         | 107 (80)              | 106 (87)         |
| Other                                            | 10 (6)                         | 7 (4)            | 9 (6)                      | 3 (2)            | 9 (7)                 | 4 (3)            |
| Ethnicity, n (%)                                 |                                |                  |                            |                  |                       |                  |
| Hispanic or Latino                               | 8 (5)                          | 8 (5)            | 5 (3)                      | 7 (5)            | 6 (4)                 | 5 (4)            |
| Not Hispanic or<br>Latino                        | 159 (94)                       | 158 (94)         | 141 (95)                   | 135 (94)         | 125 (93)              | 115 (94)         |
| Not reported                                     | 3 (2)                          | 2 (1)            | 3 (2)                      | 2 (1)            | 3 (2)                 | 2 (2)            |
| ECOG score of 1,<br>n (%)                        | 78 (46)                        | 74 (44)          | 69 (46)                    | 67 (47)          | 64 (48)               | 60 (49)          |
| Disease stage, n (%)                             |                                |                  |                            |                  |                       |                  |
| I or II                                          | 40 (24)                        | 33 (20)          | 36 (24)                    | 29 (20)          | 30 (22)               | 21 (17)          |
| III or IV                                        | 130 (76)                       | 135 (80)         | 113 (76)                   | 115 (80)         | 104 (78)              | 101 (83)         |
| 2L aalPI of 2 or 3*,<br>n (%)                    | 73 (43)                        | 75 (45)          | 62 (42)                    | 63 (44)          | 60 (45)               | 55 (45)          |
| Derived 2L aalPI of<br>2 or 3, n (%)             | 78 (46)                        | 75 (45)          | 67 (45)                    | 63 (44)          | 65 (49)               | 55 (45)          |
| Molecular subgroup per central laboratory, n (%) |                                |                  |                            |                  |                       |                  |
| GCB-like                                         | 104 (61)                       | 97 (58)          | 98 (66)                    | 92 (64)          | 98 (73)               | 94 (77)          |
| Activated B cell-<br>like                        | 14 (8)                         | 9 (5)            | 13 (9)                     | 8 (6)            | 14 (10)               | 9 (7)            |
| Unclassified                                     | 17 (10)                        | 13 (8)           | 16 (11)                    | 11 (8)           | 17 (13)               | 12 (10)          |
| Not applicable                                   | 10 (6)                         | 16 (10)          | 8 (5)                      | 14 (10)          | 5 (4)                 | 6 (5)            |
| Missing                                          | 25 (15)                        | 33 (20)          | 14 (9)                     | 19 (13)          | 0                     | 1 (1)            |
| Molecular subgroup per investigator, n (%)       |                                |                  |                            |                  |                       |                  |
| GCB-like                                         | 90 (53)                        | 78 (46)          | 82 (55)                    | 73 (51)          | 71 (53)               | 60 (49)          |
| Non-GCB-like                                     | 44 (26)                        | 49 (29)          | 39 (26)                    | 39 (27)          | 36 (27)               | 33 (27)          |
| Not tested                                       | 36 (21)                        | 41 (24)          | 28 (19)                    | 32 (22)          | 27 (20)               | 29 (24)          |

| Response to 1L therapy at randomization, n (%)                                       |          |          |          |          |          |         |
|--------------------------------------------------------------------------------------|----------|----------|----------|----------|----------|---------|
| Primary refractory disease                                                           | 123 (72) | 123 (73) | 107 (72) | 107 (74) | 91 (68)  | 86 (70) |
| Relapse at 12 mo after the initiation or completion of 1L                            | 47 (28)  | 45 (27)  | 42 (28)  | 37 (26)  | 43 (32)  | 36 (30) |
| Derived response to 1L therapy at randomization, n (%)                               |          |          |          |          |          |         |
| Primary refractory disease                                                           | 124 (73) | 125 (74) | 108 (72) | 109 (76) | 92 (69)  | 89 (73) |
| Relapse at 12 mo after the initiation or completion of 1L                            | 46 (27)  | 43 (26)  | 41 (28)  | 35 (24)  | 42 (31)  | 33 (27) |
| Disease type per central read or laboratory, n (%)                                   |          |          |          |          |          |         |
| DLBCL                                                                                | 121 (71) | 119 (71) | 118 (79) | 118 (82) | 103 (77) | 94 (77) |
| High-grade B-cell lymphoma, not otherwise specified                                  | 0        | 1 (1)    | 0        | 1 (1)    |          | 1 (1)   |
| High-grade B-cell lymphoma, including rearrangement of MYC with BCL2 or BCL6 or both | 28 (16)  | 24 (14)  | 28 (19)  | 24 (17)  | 26 (19)  | 20 (16) |
| Not confirmed or missing data                                                        | 16 (9)   | 19 (11)  | 0        | 0        | 2 (1)    | 4 (3)   |
| Other                                                                                | 5 (3)    | 5 (3)    | 3 (2)    | 1 (1)    | 3 (2)    | 3 (2)   |
| Disease type per investigator, n (%)                                                 |          |          |          |          |          |         |
| TFL <sup>†</sup>                                                                     | 19 (11)  | 25 (15)  | 14 (9)   | 24 (17)  | 15 (11)  | 21 (17) |
| LBCL, not otherwise specified                                                        | 103 (61) | 110 (65) | 93 (62)  | 92 (64)  | 84 (63)  | 79 (65) |
| T cell or histiocyte-rich LBCL                                                       | 5 (3)    | 5 (3)    | 5 (3)    | 3 (2)    | 4 (3)    | 2 (2)   |
| Epstein-Barr virus-positive DLBCL                                                    | 2 (1)    | 0        | 2 (1)    | 0        |          |         |
| High-grade BCL, including rearrangement of MYC with BCL2 or BCL6 or both             | 40 (24)  | 25 (15)  | 34 (23)  | 24 (17)  | 30 (22)  | 18 (15) |
| Primary cutaneous diffuse large B-cell lymphoma, leg type                            | 1 (1)    | 0        | 1 (1)    | 0        | 1 (1)    |         |

|                                                 |                           |                           |                           |                           |                           |                           |
|-------------------------------------------------|---------------------------|---------------------------|---------------------------|---------------------------|---------------------------|---------------------------|
| Other                                           | 0                         | 3 (2)                     | 0                         | 1 (1)                     |                           | 2 (2)                     |
| Prognostic market per central laboratory, n (%) |                           |                           |                           |                           |                           |                           |
| High-grade BCL, double-/triple-hit              | 28 (16)                   | 24 (14)                   | 28 (19)                   | 24 (17)                   | 26 (19)                   | 20 (16)                   |
| Double-expressor lymphoma                       | 55 (32)                   | 62 (37)                   | 54 (36)                   | 61 (42)                   | 48 (36)                   | 50 (41)                   |
| MYC rearrangement                               | 13 (8)                    | 7 (4)                     | 13 (9)                    | 7 (5)                     | 11 (8)                    | 7 (6)                     |
| Not applicable                                  | 71 (42)                   | 68 (40)                   | 54 (36)                   | 52 (36)                   | 49 (37)                   | 45 (37)                   |
| Missing data                                    | 3 (2)                     | 7 (4)                     | 0                         | 0                         |                           |                           |
| CD19 positivity <sup>‡</sup> , n (%)            |                           |                           |                           |                           |                           |                           |
| Yes                                             | 136 (80)                  | 132 (79)                  | 136 (91)                  | 132 (92)                  | 119 (89)                  | 107 (88)                  |
| No                                              | 13 (8)                    | 12 (7)                    | 13 (9)                    | 12 (8)                    | 8 (6)                     | 8 (7)                     |
| Missing                                         | 21 (12)                   | 24 (14)                   | 0                         | 0                         | 7 (5)                     | 7 (6)                     |
| Bone marrow involvement, n (%)                  |                           |                           |                           |                           |                           |                           |
| Yes                                             | 16 (9)                    | 14 (8)                    | 15 (10)                   | 12 (8)                    | 12 (9)                    | 12 (10)                   |
| No                                              | 154 (91)                  | 154 (92)                  | 134 (90)                  | 132 (92)                  | 122 (91)                  | 110 (90)                  |
| Elevated LDH, n (%)                             | 92 (54)                   | 90 (54)                   | 81 (54)                   | 75 (52)                   | 77 (57)                   | 65 (53)                   |
| Median tumor burden (range), mm <sup>2</sup>    | 2122.9<br>(181,<br>22538) | 2135.1<br>(252,<br>20117) | 2108.7<br>(181,<br>22538) | 2167.3<br>(252,<br>20117) | 2137.3<br>(181,<br>22538) | 2326.2<br>(270,<br>20117) |

\*As determined by IxRS; †In ZUMA-7, values indicate large-cell transformation from FL; ‡CD19 positivity was assessed by immunohistochemical testing.

-, not available; 1L, first line; 2L, second line; 3L, third line; aalPI, age-adjusted International Prognostics Index; ASCT, autologous stem cell transplantation; Axi-cel, axicabtagene ciloleucel; BCL, B cell lymphoma; DLBCL, diffuse large B cell lymphoma; ECOG, European Cooperative Oncology Group; FL, follicular lymphoma; GCB-like, germinal center B cell-like; IPI, International Prognostics Index; IxRS, interactive voice or Web-based response system; mo, months; LBCL, large B cell lymphoma; LDH, lactate dehydrogenase; Non-GCB-like, non-germinal center B cell-like; PMBCL, primary mediastinal large B cell lymphoma; SOC, standard of care; y, years; TLF, transformed follicular lymphoma.

**Supplementary Table 8. Baseline characteristics of patients from ZUMA-1 Cohorts 1+2; based on data availability, as indicated.**

|                                                  | ZUMA-1 Cohorts 1+2    |                         |
|--------------------------------------------------|-----------------------|-------------------------|
|                                                  | Cohort 1+2<br>(N=101) | Pre-3L biopsy<br>(N=25) |
| Median age (range), y                            | 58.0<br>(23, 76)      | 60.0<br>(27, 76)        |
| ≥65 years, n (%)                                 | 24 (24)               | 6 (24)                  |
| Male sex, n (%)                                  | 68 (67)               | 15 (60)                 |
| Race, n (%)                                      |                       |                         |
| American Indian or Alaska Native                 | 0                     | 0                       |
| Asian                                            | 3 (3)                 | 0                       |
| Black or African American                        | 4 (4)                 | 0                       |
| Native Hawaiian or Other Pacific Islander        | 0                     | 0                       |
| White                                            | 87 (86)               | 23 (92)                 |
| Other                                            | 7 (7)                 | 2 (8)                   |
| Ethnicity, n (%)                                 |                       |                         |
| Hispanic or Latino                               | 18 (18)               | 5 (20)                  |
| Not Hispanic or Latino                           | 83 (82)               | 20 (80)                 |
| Not reported                                     | 0                     | 0                       |
| ECOG score of 1, n (%)                           | 59 (58)               | 13 (52)                 |
| Disease stage, n (%)                             |                       |                         |
| I or II                                          | 15 (15)               | 8 (32)                  |
| III or IV                                        | 86 (85)               | 17 (68)                 |
| IPI, n (%)                                       |                       |                         |
| 0                                                | 2 (2)                 | 5 (20)                  |
| 1                                                | 23 (23)               | 5 (20)                  |
| 2                                                | 30 (30)               | 7 (28)                  |
| 3                                                | 27 (27)               | 4 (16)                  |
| 4                                                | 19 (19)               | 4 (16)                  |
| Molecular subgroup per central laboratory, n (%) |                       |                         |
| GCB-like                                         | 49 (49)               | 12 (48)                 |
| Activated B cell-like                            | 17 (17)               | 4 (16)                  |
| Unclassified                                     | 3 (3)                 | 0                       |
| Not applicable                                   | 1 (1)                 | 0                       |
| Missing                                          | 31 (31)               | 9 (36)                  |
| Molecular subgroup per investigator, n (%)       |                       |                         |
| GCB-like                                         | 46 (46)               | 14 (56)                 |
| Non-GCB-like                                     | 0                     | 0                       |
| Not tested                                       | 0                     | 0                       |
| Activated B cell-like                            | 10 (10)               | 1 (4)                   |

|                                                       |               |               |
|-------------------------------------------------------|---------------|---------------|
| Unknown                                               | 44 (44)       | 10 (40)       |
| Missing                                               | 1 (1)         | 0             |
| Refractory subgroup, n (%)                            |               |               |
| Primary refractory                                    | 3 (3)         | 1 (4)         |
| Refractory to 2 <sup>nd</sup> or greater line therapy | 77 (76)       | 16 (64)       |
| Relapse post ASCT                                     | 21 (21)       | 7 (28)        |
| Disease type per central read or laboratory, n (%)    |               |               |
| DLBCL                                                 | 69 (68)       | 21 (84)       |
| DLBCL and small BCL                                   | 1 (1)         | 1 (4)         |
| DLBCL to TFL and small BCL                            | 1 (1)         | 0             |
| PMBCL                                                 | 3 (3)         | 1 (4)         |
| TFL                                                   | 9 (9)         | 0             |
| Not confirmed or missing data                         | 1 (1)         | 0             |
| Other                                                 |               |               |
| Disease type per investigator, n (%)                  |               |               |
| DLBCL                                                 | 77 (76)       | 20 (80)       |
| PMBCL                                                 | 8 (8)         | 2 (8)         |
| TFL                                                   | 16 (16)       | 3 (12)        |
| CD19 positivity <sup>‡</sup> , n (%)                  |               |               |
| Yes                                                   | 74 (73)       | 22 (88)       |
| No                                                    | 8 (8)         | 2 (8)         |
| Bone marrow involvement, n (%)                        |               |               |
| Yes                                                   | 8 (8)         | 1 (4)         |
| No                                                    | 87 (86)       | 24 (96)       |
| Median tumor burden (range), mm <sup>2</sup>          | 58.0 (23, 76) | 60.0 (27, 76) |

<sup>‡</sup>CD19 positivity was assessed by immunohistochemical testing.

1L, first line; 2L, second line; 3L, third line; aaIPI, age-adjusted International Prognostics Index; ASCT, autologous stem cell transplantation; Axi-cel, axicabtagene ciloleucel; BCL, B cell lymphoma; DLBCL, diffuse large B cell lymphoma; ECOG, European Cooperative Oncology Group; FL, follicular lymphoma; GCB-like, germinal center B cell-like; IPI, International Prognostics Index; IxRS, interactive voice or Web-based response system; mo, months; LBCL, large B cell lymphoma; LDH, lactate dehydrogenase; Non-GCB-like; non-germinal center B cell-like; PMBCL, primary mediastinal large B cell lymphoma; SOC, standard of care; y, years; TLF, transformed follicular lymphoma.

## **Supplementary Figure 1. Nanostring IO360™ gene clustering reveals distinct TME immune contextures.**

Heatmap representation of Spearman rank-order correlation values between NanoString IO360™ GESs and genes used in the creation of the NanoString IO360™ GES scores. The NanoString IO360™ GES ordering is matched with the unsupervised clustering order from the heatmap in Figure 3a while unsupervised clustering was performed for the rows of the heatmap (genes). Row-side annotation coloring corresponds to the NanoString IO360™ GES(s) associated with each gene (row); in cases where a gene is associated with more than one signature, it was assigned to the Multiple IO360 Signatures annotation. Row names were colored purple if the gene was significantly associated with ongoing response versus others (response followed by progressive disease and no response) by the Wilcoxon rank sum test in either treatment arm. APM, antigen processing and presentation machinery; axi-cel, axicabtagene ciloleucel; ARG1, arginase1; BPI, B Cell and Proliferation Index; DC, dendritic cell; EFS, event-free survival; HGBL, high-grade B-cell lymphoma; HR, hazard ratio; IDO1, indoleamine 2,3-dioxygenase 1; IFN, interferon; IL10, interleukin 10; JAKSTAT, Janus kinase-signal transducer and activator of transcription; MAGE, melanoma antigen gene; MHC, major histocompatibility complex; MMR, mismatch repair; MSI, microsatellite instability; NK, natural killer; NOS, nitric oxide synthase; PD, programmed death; PD-L, programmed death-ligand; SII, Stromal and Immunosuppressive Index; SOC, standard of care; TGF, transforming growth factor; Th1, T helper type 1; TIS, tumor inflammation signature; Treg, regulatory T cell.

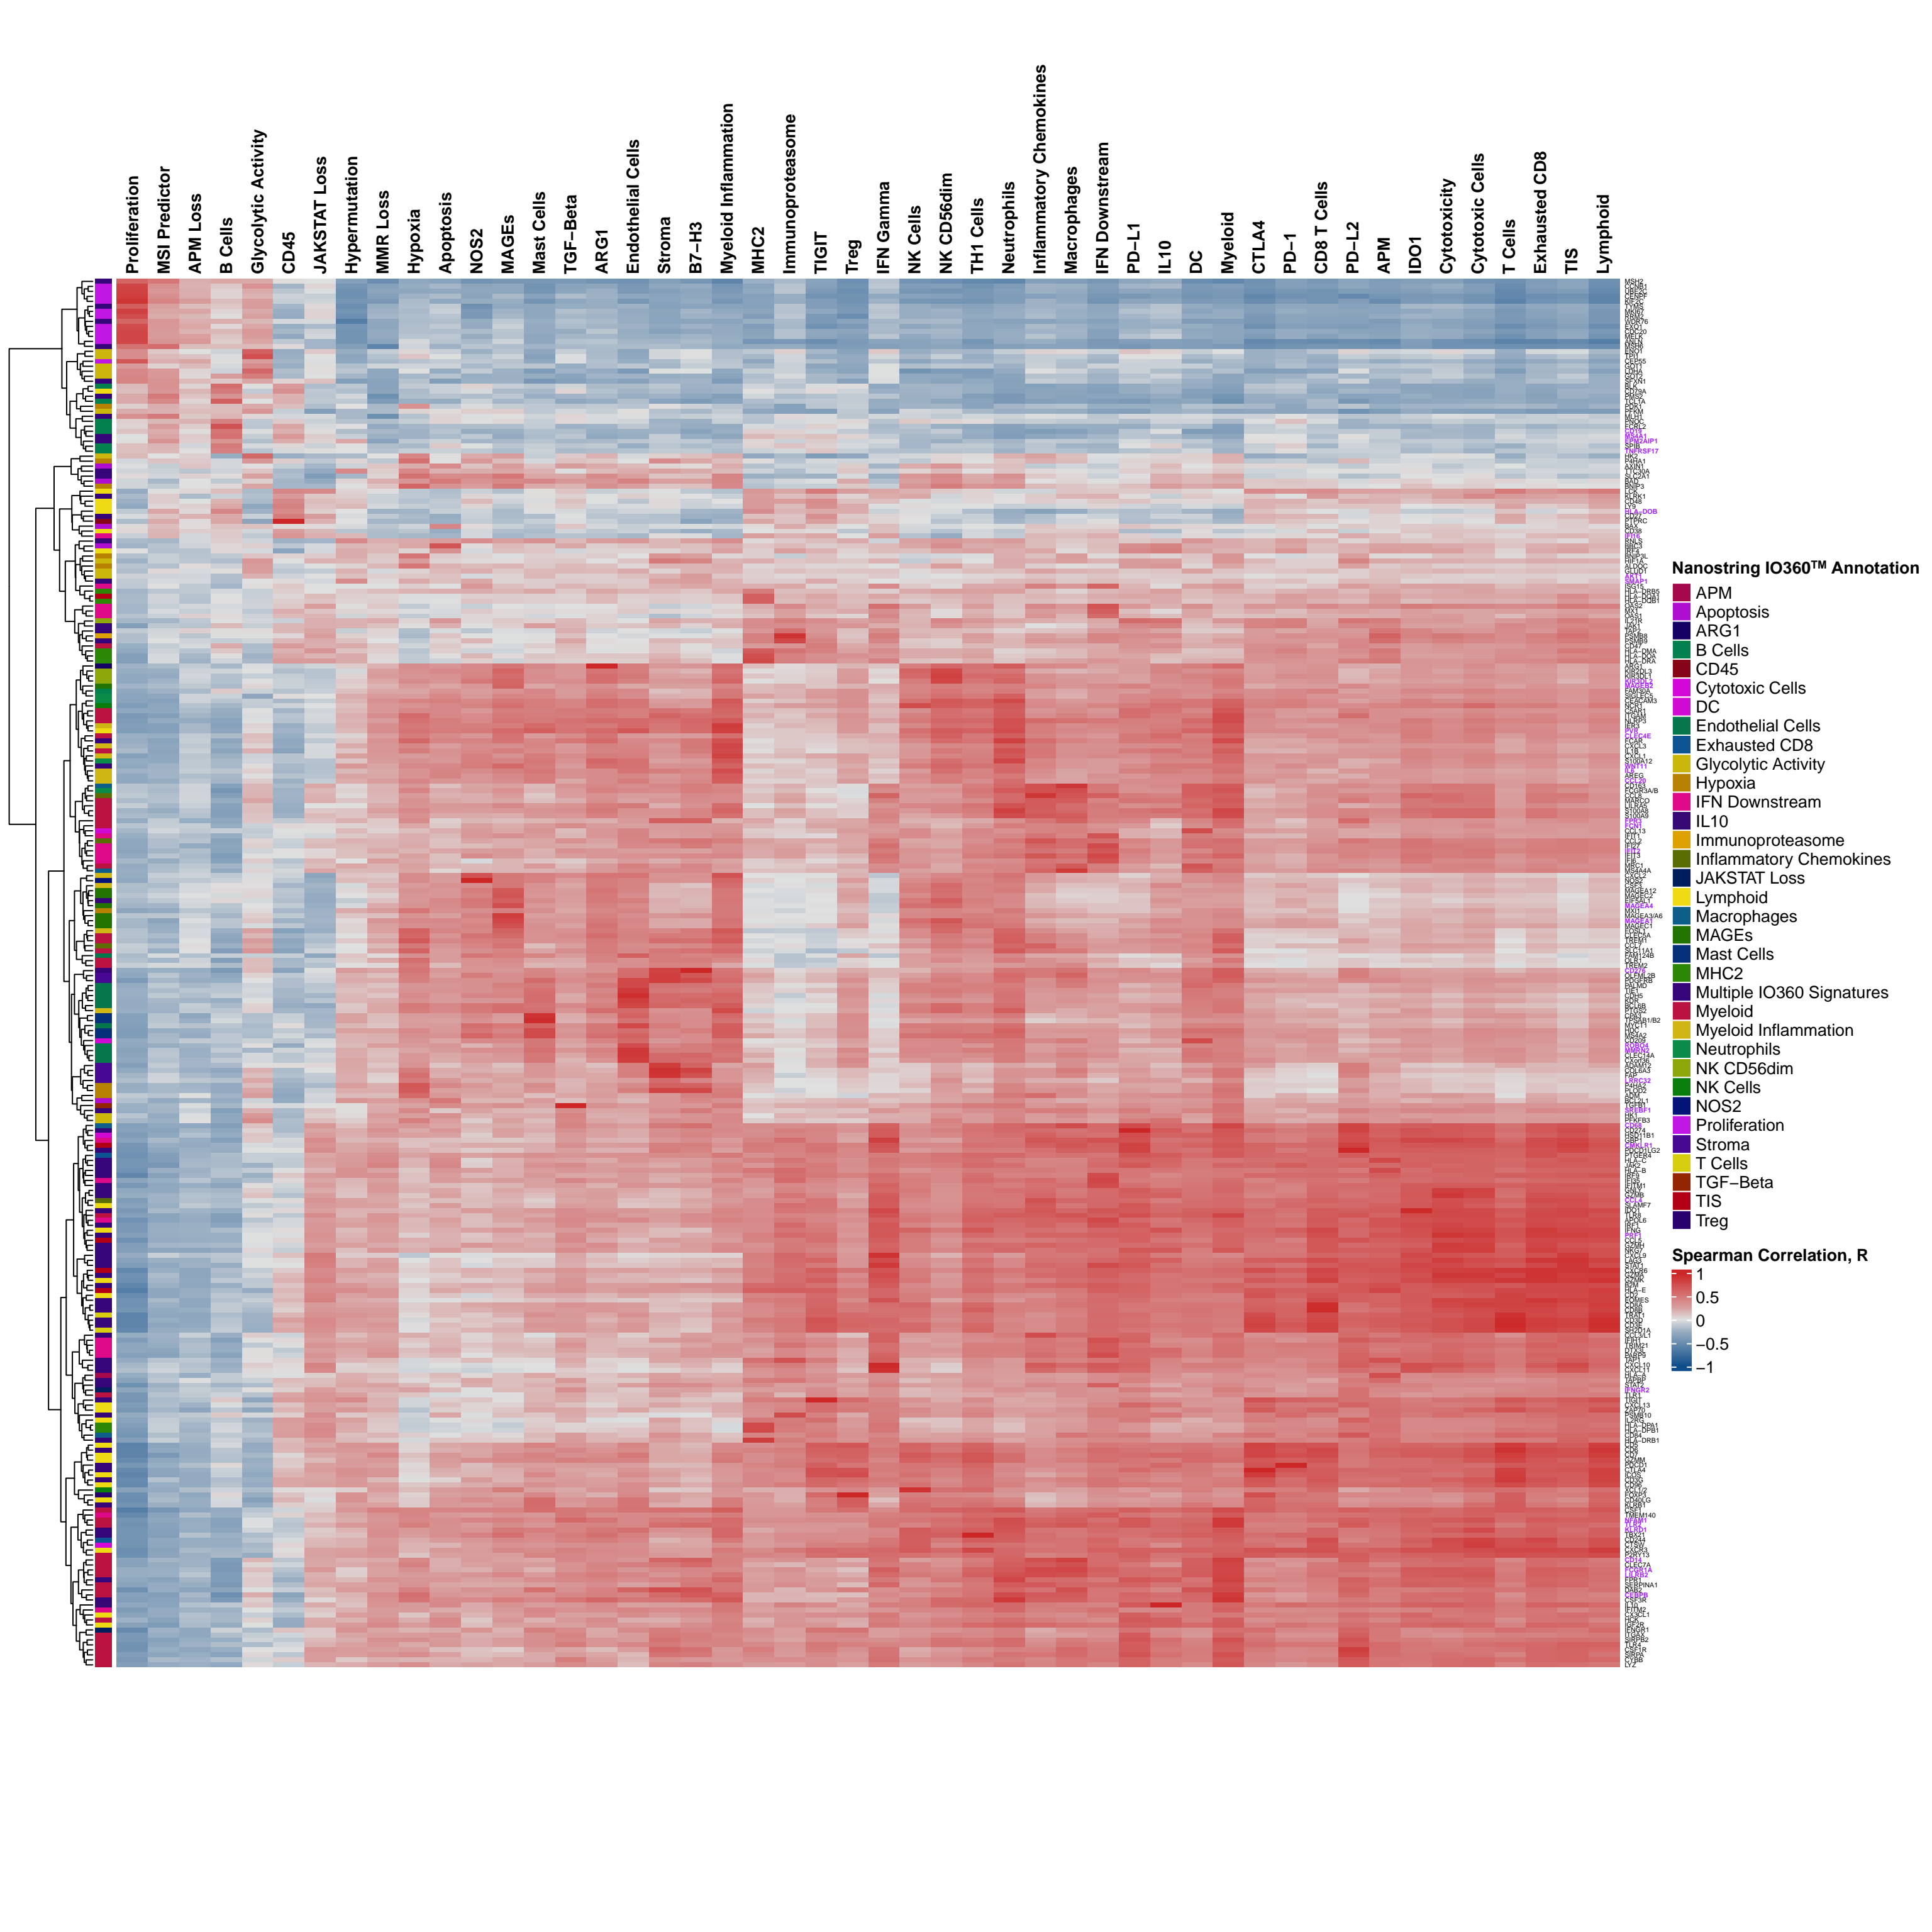



**Supplementary Figure 2. EFS and DOR by median of cluster 3 and cluster 4 and treatment arm.**

Panels a and b show the Kaplan-Meier estimate of EFS by median of cluster 3 and cluster 4, respectively, and treatment arm (axi-cel versus SOC). Panels c and d show the Kaplan-Meier estimate of DOR by median of cluster 3 and cluster 4, respectively, and treatment arm (axi-cel versus SOC). For panels a-d, patients who did not meet the criteria for an event had their data censored (tick marks). Unstratified Cox proportional hazards *P* values (two-sided) are presented. Axi-cel, axicabtagene ciloleucel; DOR, duration of response; EFS, event-free survival; SOC, standard of care.

**a** EFS by Median of Cluster 3, High vs Low (Safety Analysis Set)

|                             | Cluster 3 High<br>(Axi-Cel vs SOC) | Cluster 3 Low<br>(Axi-Cel vs SOC) | Axi-Cel Cluster 3<br>(High vs Low) | SOC Cluster 3<br>(High vs Low) |
|-----------------------------|------------------------------------|-----------------------------------|------------------------------------|--------------------------------|
| Unstratified HR<br>(95% CI) | 0.361<br>(0.235, 0.552)            | 0.385<br>(0.253, 0.586)           | 0.953<br>(0.610, 1.489)            | 1.044<br>(0.706, 1.543)        |
| Unstratified P value        | <.0001                             | <.0001                            | 0.8336                             | 0.8291                         |

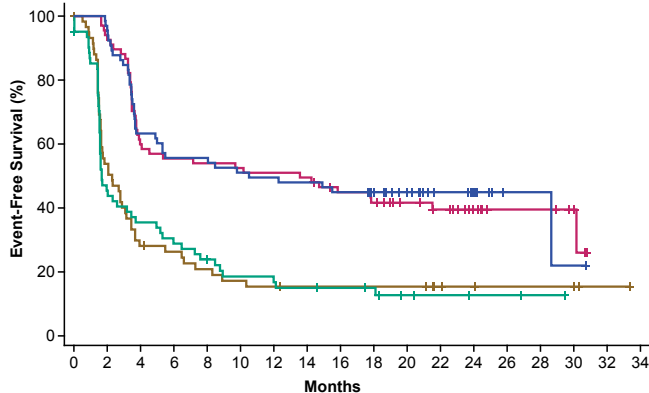

No. at risk

|                         |    |    |    |    |    |    |    |    |    |    |    |    |    |   |   |   |   |   |
|-------------------------|----|----|----|----|----|----|----|----|----|----|----|----|----|---|---|---|---|---|
| Axi-Cel, Cluster 3 High | 66 | 64 | 42 | 37 | 37 | 34 | 33 | 32 | 30 | 27 | 21 | 15 | 11 | 2 | 2 | 1 | 0 |   |
| Axi-Cel, Cluster 3 Low  | 68 | 64 | 41 | 38 | 37 | 36 | 35 | 34 | 29 | 26 | 21 | 18 | 12 | 8 | 4 | 0 | 0 |   |
| SOC, Cluster 3 High     | 62 | 28 | 22 | 18 | 14 | 11 | 10 | 9  | 8  | 7  | 4  | 3  | 2  | 2 | 1 | 0 | 0 |   |
| SOC, Cluster 3 Low      | 60 | 32 | 17 | 15 | 12 | 10 | 9  | 8  | 8  | 8  | 8  | 5  | 4  | 3 | 3 | 3 | 1 | 0 |

**b** EFS by Median of Cluster 4, High vs Low (Safety Analysis Set)

|                             | Cluster 4 High<br>(Axi-Cel vs SOC) | Cluster 4 Low<br>(Axi-Cel vs SOC) | Axi-Cel Cluster 4<br>(High vs Low) | SOC Cluster 4<br>(High vs Low) |
|-----------------------------|------------------------------------|-----------------------------------|------------------------------------|--------------------------------|
| Unstratified HR<br>(95% CI) | 0.369<br>(0.239, 0.569)            | 0.366<br>(0.241, 0.554)           | 0.873<br>(0.558, 1.368)            | 0.888<br>(0.601, 1.313)        |
| Unstratified P value        | <.0001                             | <.0001                            | 0.5545                             | 0.5511                         |

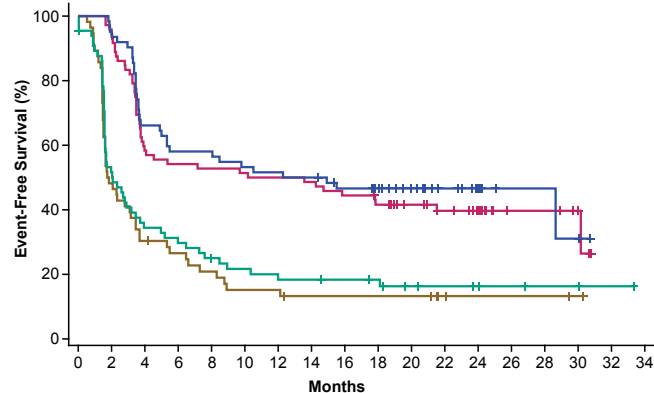

No. at risk

|                         |    |    |    |    |    |    |    |    |    |    |    |    |    |   |   |   |   |   |
|-------------------------|----|----|----|----|----|----|----|----|----|----|----|----|----|---|---|---|---|---|
| Axi-Cel, Cluster 4 High | 62 | 59 | 41 | 36 | 36 | 33 | 32 | 31 | 27 | 24 | 18 | 13 | 8  | 3 | 3 | 2 | 0 |   |
| Axi-Cel, Cluster 4 Low  | 72 | 69 | 42 | 39 | 38 | 37 | 36 | 35 | 32 | 29 | 24 | 20 | 15 | 7 | 7 | 3 | 0 |   |
| SOC, Cluster 4 High     | 66 | 33 | 22 | 19 | 15 | 13 | 11 | 11 | 10 | 9  | 6  | 5  | 4  | 3 | 2 | 2 | 1 | 0 |
| SOC, Cluster 4 Low      | 56 | 27 | 17 | 14 | 11 | 8  | 8  | 6  | 6  | 6  | 6  | 6  | 3  | 2 | 2 | 2 | 1 | 0 |

**c** DOR by Median of Cluster 3, High vs Low (Safety Analysis Set)

|                             | Cluster 3 High<br>(Axi-Cel vs SOC) | Cluster 3 Low<br>(Axi-Cel vs SOC) | Axi-Cel Cluster 3<br>(High vs Low) | SOC Cluster 3<br>(High vs Low) |
|-----------------------------|------------------------------------|-----------------------------------|------------------------------------|--------------------------------|
| Unstratified HR<br>(95% CI) | 0.827<br>(0.412, 1.659)            | 0.739<br>(0.401, 1.361)           | 0.854<br>(0.498, 1.465)            | 0.687<br>(0.324, 1.456)        |
| Unstratified P value        | 0.5926                             | 0.3309                            | 0.5669                             | 0.3269                         |

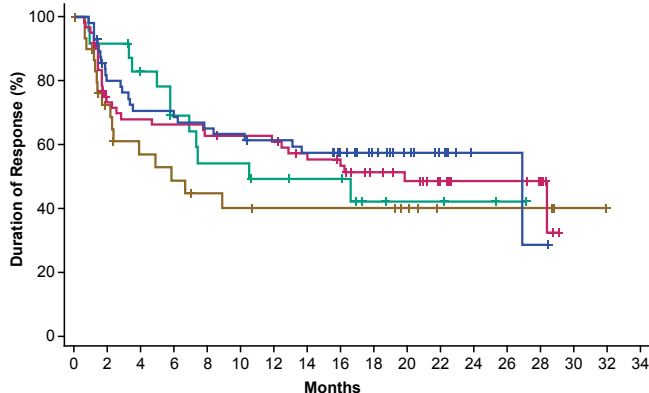

No. at risk

|                         |    |    |    |    |    |    |    |    |    |    |    |    |   |   |   |   |   |
|-------------------------|----|----|----|----|----|----|----|----|----|----|----|----|---|---|---|---|---|
| Axi-Cel, Cluster 3 High | 56 | 43 | 38 | 37 | 35 | 34 | 32 | 30 | 26 | 21 | 15 | 9  | 2 | 2 | 1 | 0 | 0 |
| Axi-Cel, Cluster 3 Low  | 62 | 42 | 39 | 38 | 36 | 35 | 34 | 29 | 27 | 21 | 18 | 12 | 8 | 8 | 5 | 0 | 0 |
| SOC, Cluster 3 High     | 30 | 22 | 18 | 14 | 11 | 11 | 9  | 8  | 8  | 4  | 3  | 3  | 2 | 1 | 0 | 0 | 0 |
| SOC, Cluster 3 Low      | 35 | 19 | 14 | 12 | 10 | 9  | 8  | 8  | 8  | 8  | 6  | 3  | 3 | 3 | 3 | 1 | 0 |

**d** DOR by Median of Cluster 4, High vs Low (Safety Analysis Set)

|                             | Cluster 4 High<br>(Axi-Cel vs SOC) | Cluster 4 Low<br>(Axi-Cel vs SOC) | Axi-Cel Cluster 4<br>(High vs Low) | SOC Cluster 4<br>(High vs Low) |
|-----------------------------|------------------------------------|-----------------------------------|------------------------------------|--------------------------------|
| Unstratified HR<br>(95% CI) | 0.696<br>(0.363, 1.336)            | 0.813<br>(0.423, 1.561)           | 0.806<br>(0.469, 1.386)            | 0.878<br>(0.417, 1.849)        |
| Unstratified P value        | 0.2758                             | 0.5335                            | 0.4358                             | 0.7313                         |

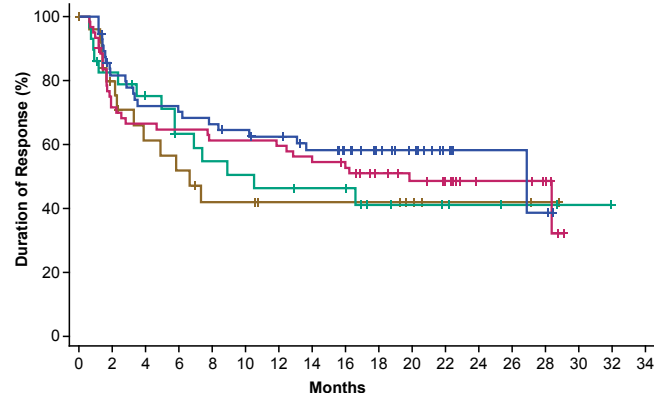

No. at risk

|                         |    |    |    |    |    |    |    |    |    |    |    |    |   |   |   |   |   |
|-------------------------|----|----|----|----|----|----|----|----|----|----|----|----|---|---|---|---|---|
| Axi-Cel, Cluster 4 High | 56 | 43 | 38 | 37 | 35 | 33 | 31 | 27 | 23 | 18 | 13 | 7  | 3 | 3 | 2 | 0 | 0 |
| Axi-Cel, Cluster 4 Low  | 62 | 42 | 39 | 38 | 36 | 36 | 35 | 32 | 30 | 24 | 20 | 14 | 7 | 7 | 4 | 0 | 0 |
| SOC, Cluster 4 High     | 36 | 23 | 19 | 15 | 13 | 12 | 11 | 10 | 10 | 6  | 5  | 4  | 3 | 2 | 2 | 1 | 0 |
| SOC, Cluster 4 Low      | 29 | 18 | 13 | 11 | 8  | 8  | 6  | 6  | 6  | 6  | 4  | 2  | 2 | 2 | 1 | 0 | 0 |

**Supplementary Figure 3. CD19 H-score correlated with CD19 gene expression and B-cell IO360™ signature.**

Panel a shows the relation between CD19 H-score and CD19 gene count, as assessed by Spearman rank-sum correlation. Panel b shows the association between CD19 H-score and B-cell signature (by IO360™), as assessed by Spearman rank-sum correlation. For both panels, statistical significance of the Spearman correlation coefficient (two-sided *P* value), as shown, was calculated. Blue dots represent individual patient data from 127 (panel A) and 127 (panel B) patients.

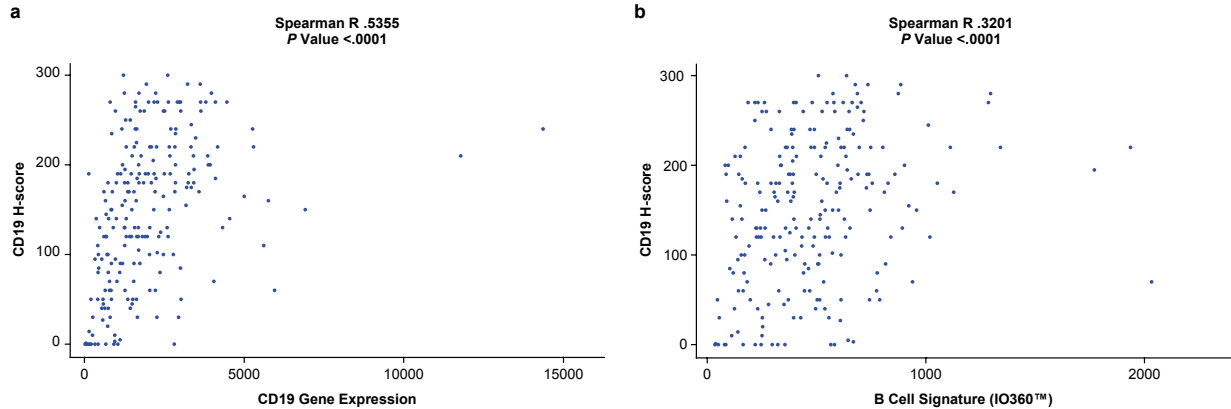

**Supplementary Figure 4. Gating strategy used to derive T cell phenotypes.**

Singlets/Viable/CD3+ cells were gated to identify T cells. Further subsets were identified by CD8, CCR7, CD45RA markers.

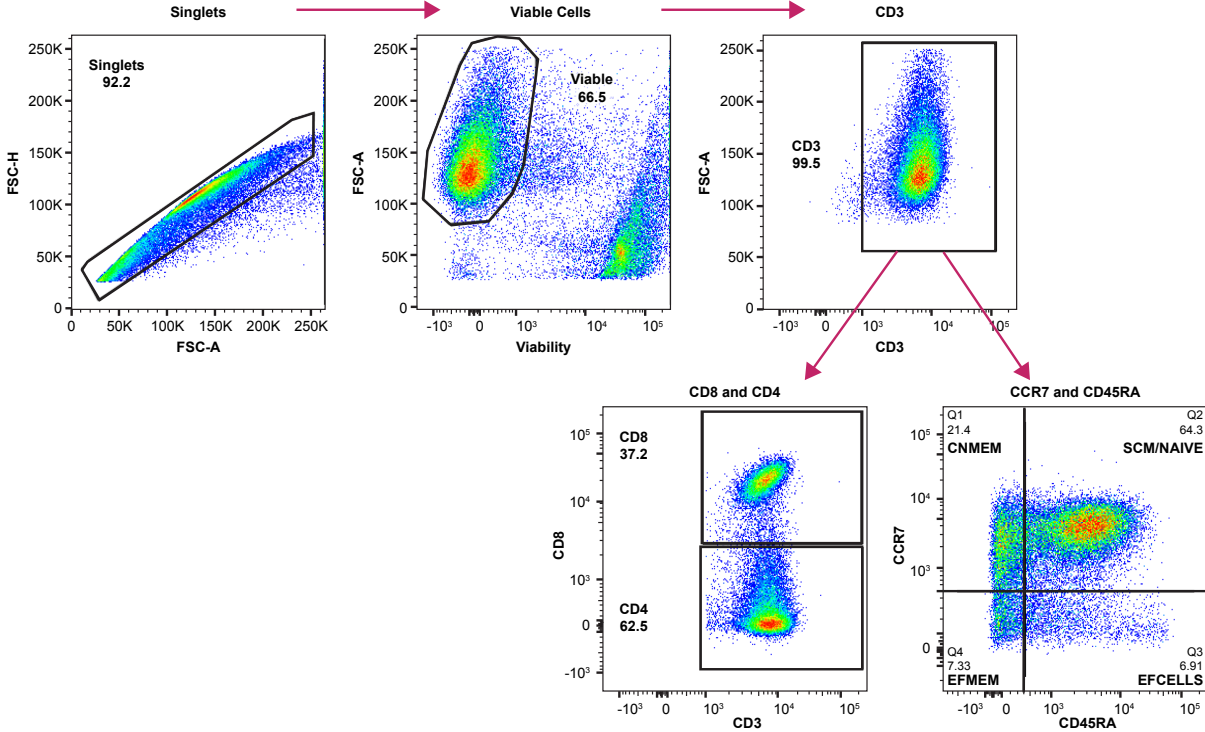

## Supplementary Figure 5. Logistic regression curves of responses by SPD.

Panels a–f show logistic regression curves of responses in the axi-cel (Panels a–c) and SOC (Panels d–f) arms by tumor burden, as measured by SPD. Responses shown include best overall response per central assessment (Panels a and d), objective response per central assessment (Panels b and e), and ongoing response per central assessment (Panels c and f). For panels a–f, statistical significance was calculated via logistic regression and reported as two-sided *P* values; the blue ribbons represent the 95% confidence interval of the regression line. Axi-cel, axicabtagene ciloleucel; SOC, standard of care; SPD, sum of product diameters.

**a** Best Overall Response (Central) in Axi-Cel Arm

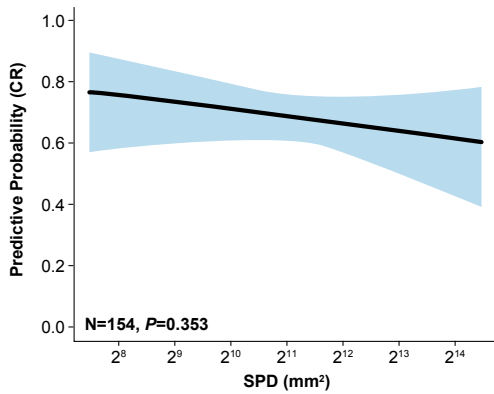

**d** Best Overall Response (Central) in SOC Arm

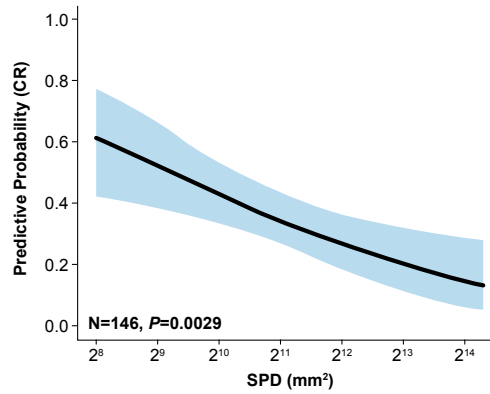

**b** Objective Response (Central) in Axi-Cel Arm

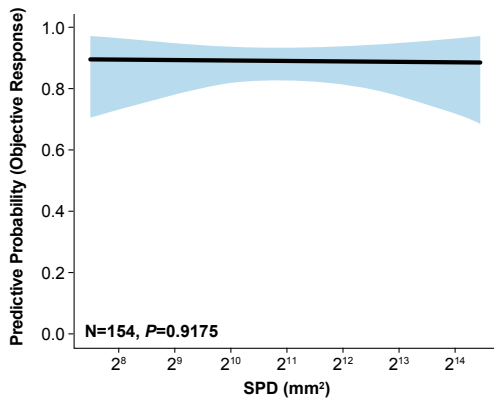

**e** Objective Response (Central) in SOC Arm

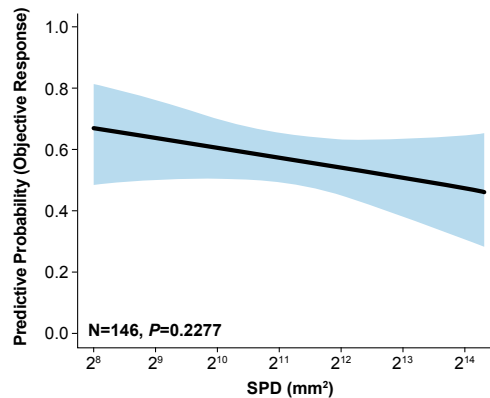

**c** Ongoing Response (Central) in Axi-Cel Arm

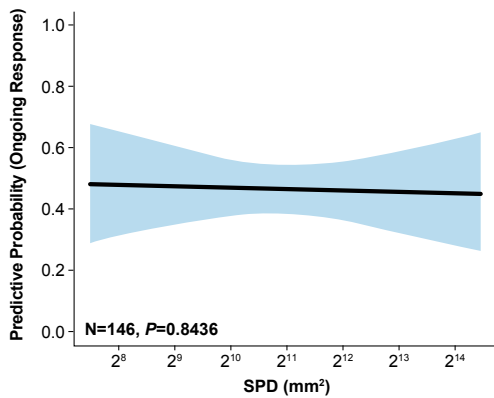

**f** Ongoing Response (Central) in SOC Arm

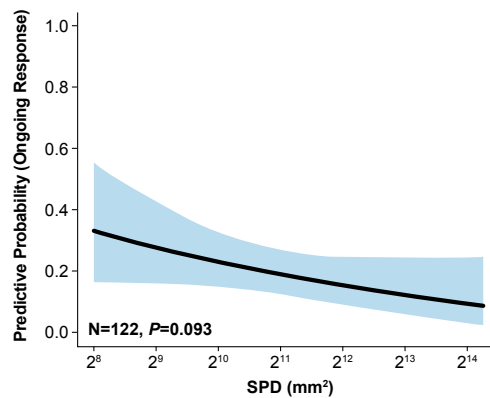

## **Supplementary Figure 6. Increased thresholds for tumor burden (by SPD) and LDH did not impact axi-cel EFS.**

Panel a shows the Kaplan-Meier estimate of EFS by 3721 mm<sup>2</sup> as the cutoff value for high versus low SPD and treatment arm (axi-cel versus SOC). Panel b shows the Kaplan-Meier estimate of EFS by two times ULN (upper limit of normal) LDH and treatment arm (axi-cel versus SOC). For panels a and b, patients who did not meet the criteria for an event had their data censored (tick marks); unstratified Cox proportional hazards *P* values (two-sided) are presented. Panel c shows the logistic regression of ongoing response for ZUMA-7 axi-cel patients in the top quartile of SPD. Panel d shows the logistic regression of ongoing response for ZUMA-7 axi-cel patients with >median SPD. For panels c-d, statistical significance was calculated via logistic regression and reported as two-sided *P* values; the gray ribbons represent the 95% confidence interval of the regression line. axi-cel, axicabtagene ciloleucel; CI, confidence interval; EFS, event-free survival; HR, hazard ratio; LDH, lactate dehydrogenase; SOC, standard of care; SPD, sum of product diameters; ULN, upper level of normal.

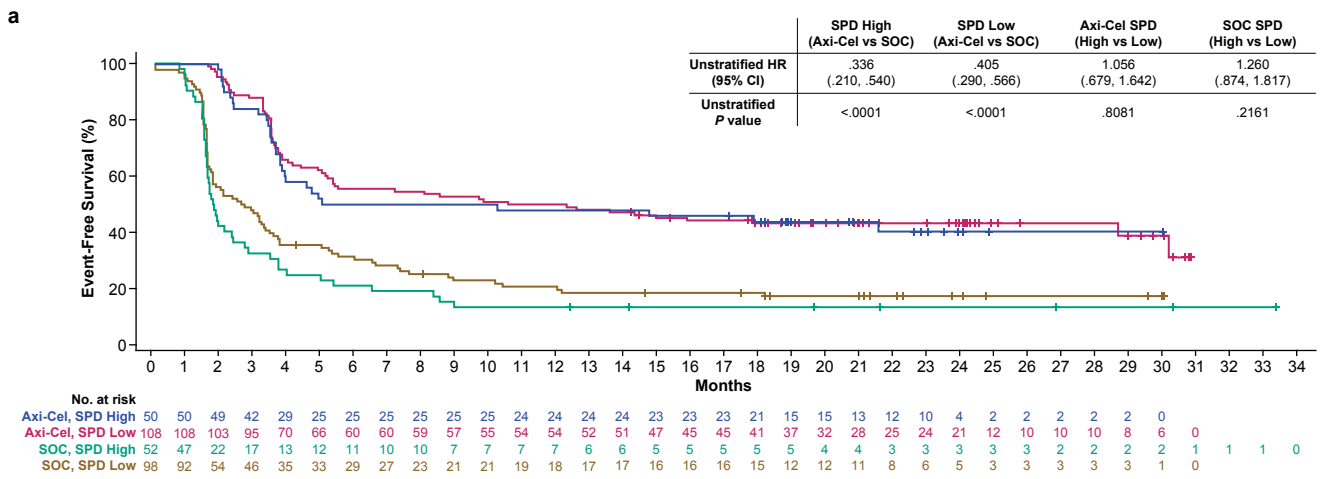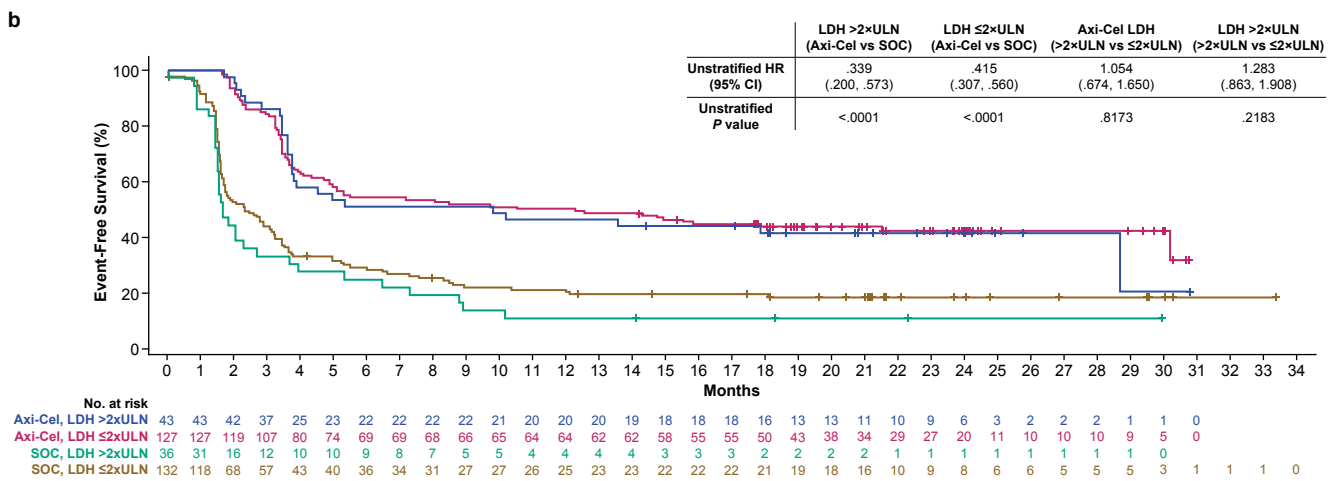

**c** Top Quartile SPD Patients (ZUMA-7)

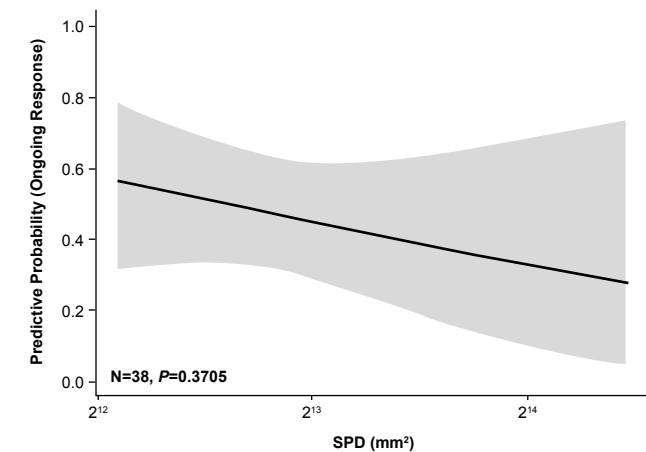

**d** >Median SPD Patients (ZUMA-7)

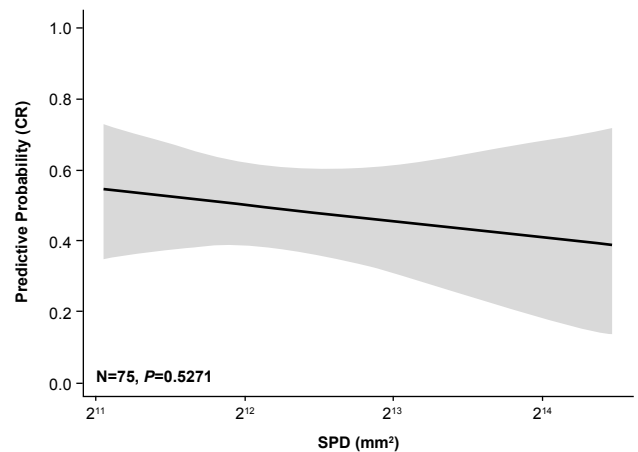

## **Supplementary Figure 7. Principal Component Analysis of Gene Expression Derived Features Significantly Associated with Clinical Outcome**

Principal Component Analysis (PCA) of all genomic features derived from Nanostring expression profiling which were significantly associated with clinical efficacy in the Axi-cel or SOC arm (p-value < 0.05; Ongoing Response, EFS, or DOR). Subjects included in this analysis were those with Nanostring expression profiling of pretreatment tumor biopsies which passed QC (N = 256). (a) PCA loadings plot where the gray arrows represent the Pearson correlation between the listed variable and the two principal components plotted. (b-ad) PCA plots where patients are represented as dots and their location on the plot corresponds to the first two principal component values for each subject. (b-f) Categorical information related to the patient's treatment arm, subtype of disease, or ongoing response status was overlaid on PCA patient plots with category colors indicated in the figure legends. Subjects without data for the corresponding feature are shown in gray. (g-z) Continuous variables derived from Nanostring expression profiling such as Cluster scores, IO360 signature scores, and single gene expression, were log<sub>10</sub> transformed and dot colors reflect the subject's value for that feature relative to the median value across all subjects included; gray represents the median value, blue represents values below the median, and red represents values above the median. (aa-ad) Continuous variables which were not derived from Nanostring expression profiling and were associated with efficacy in either treatment arm were log<sub>10</sub> transformed and dot colors reflect the subject's value for that feature relative to the median value across all subjects included; gray represents the median value, blue represents values below the median, and red represents values above the median.



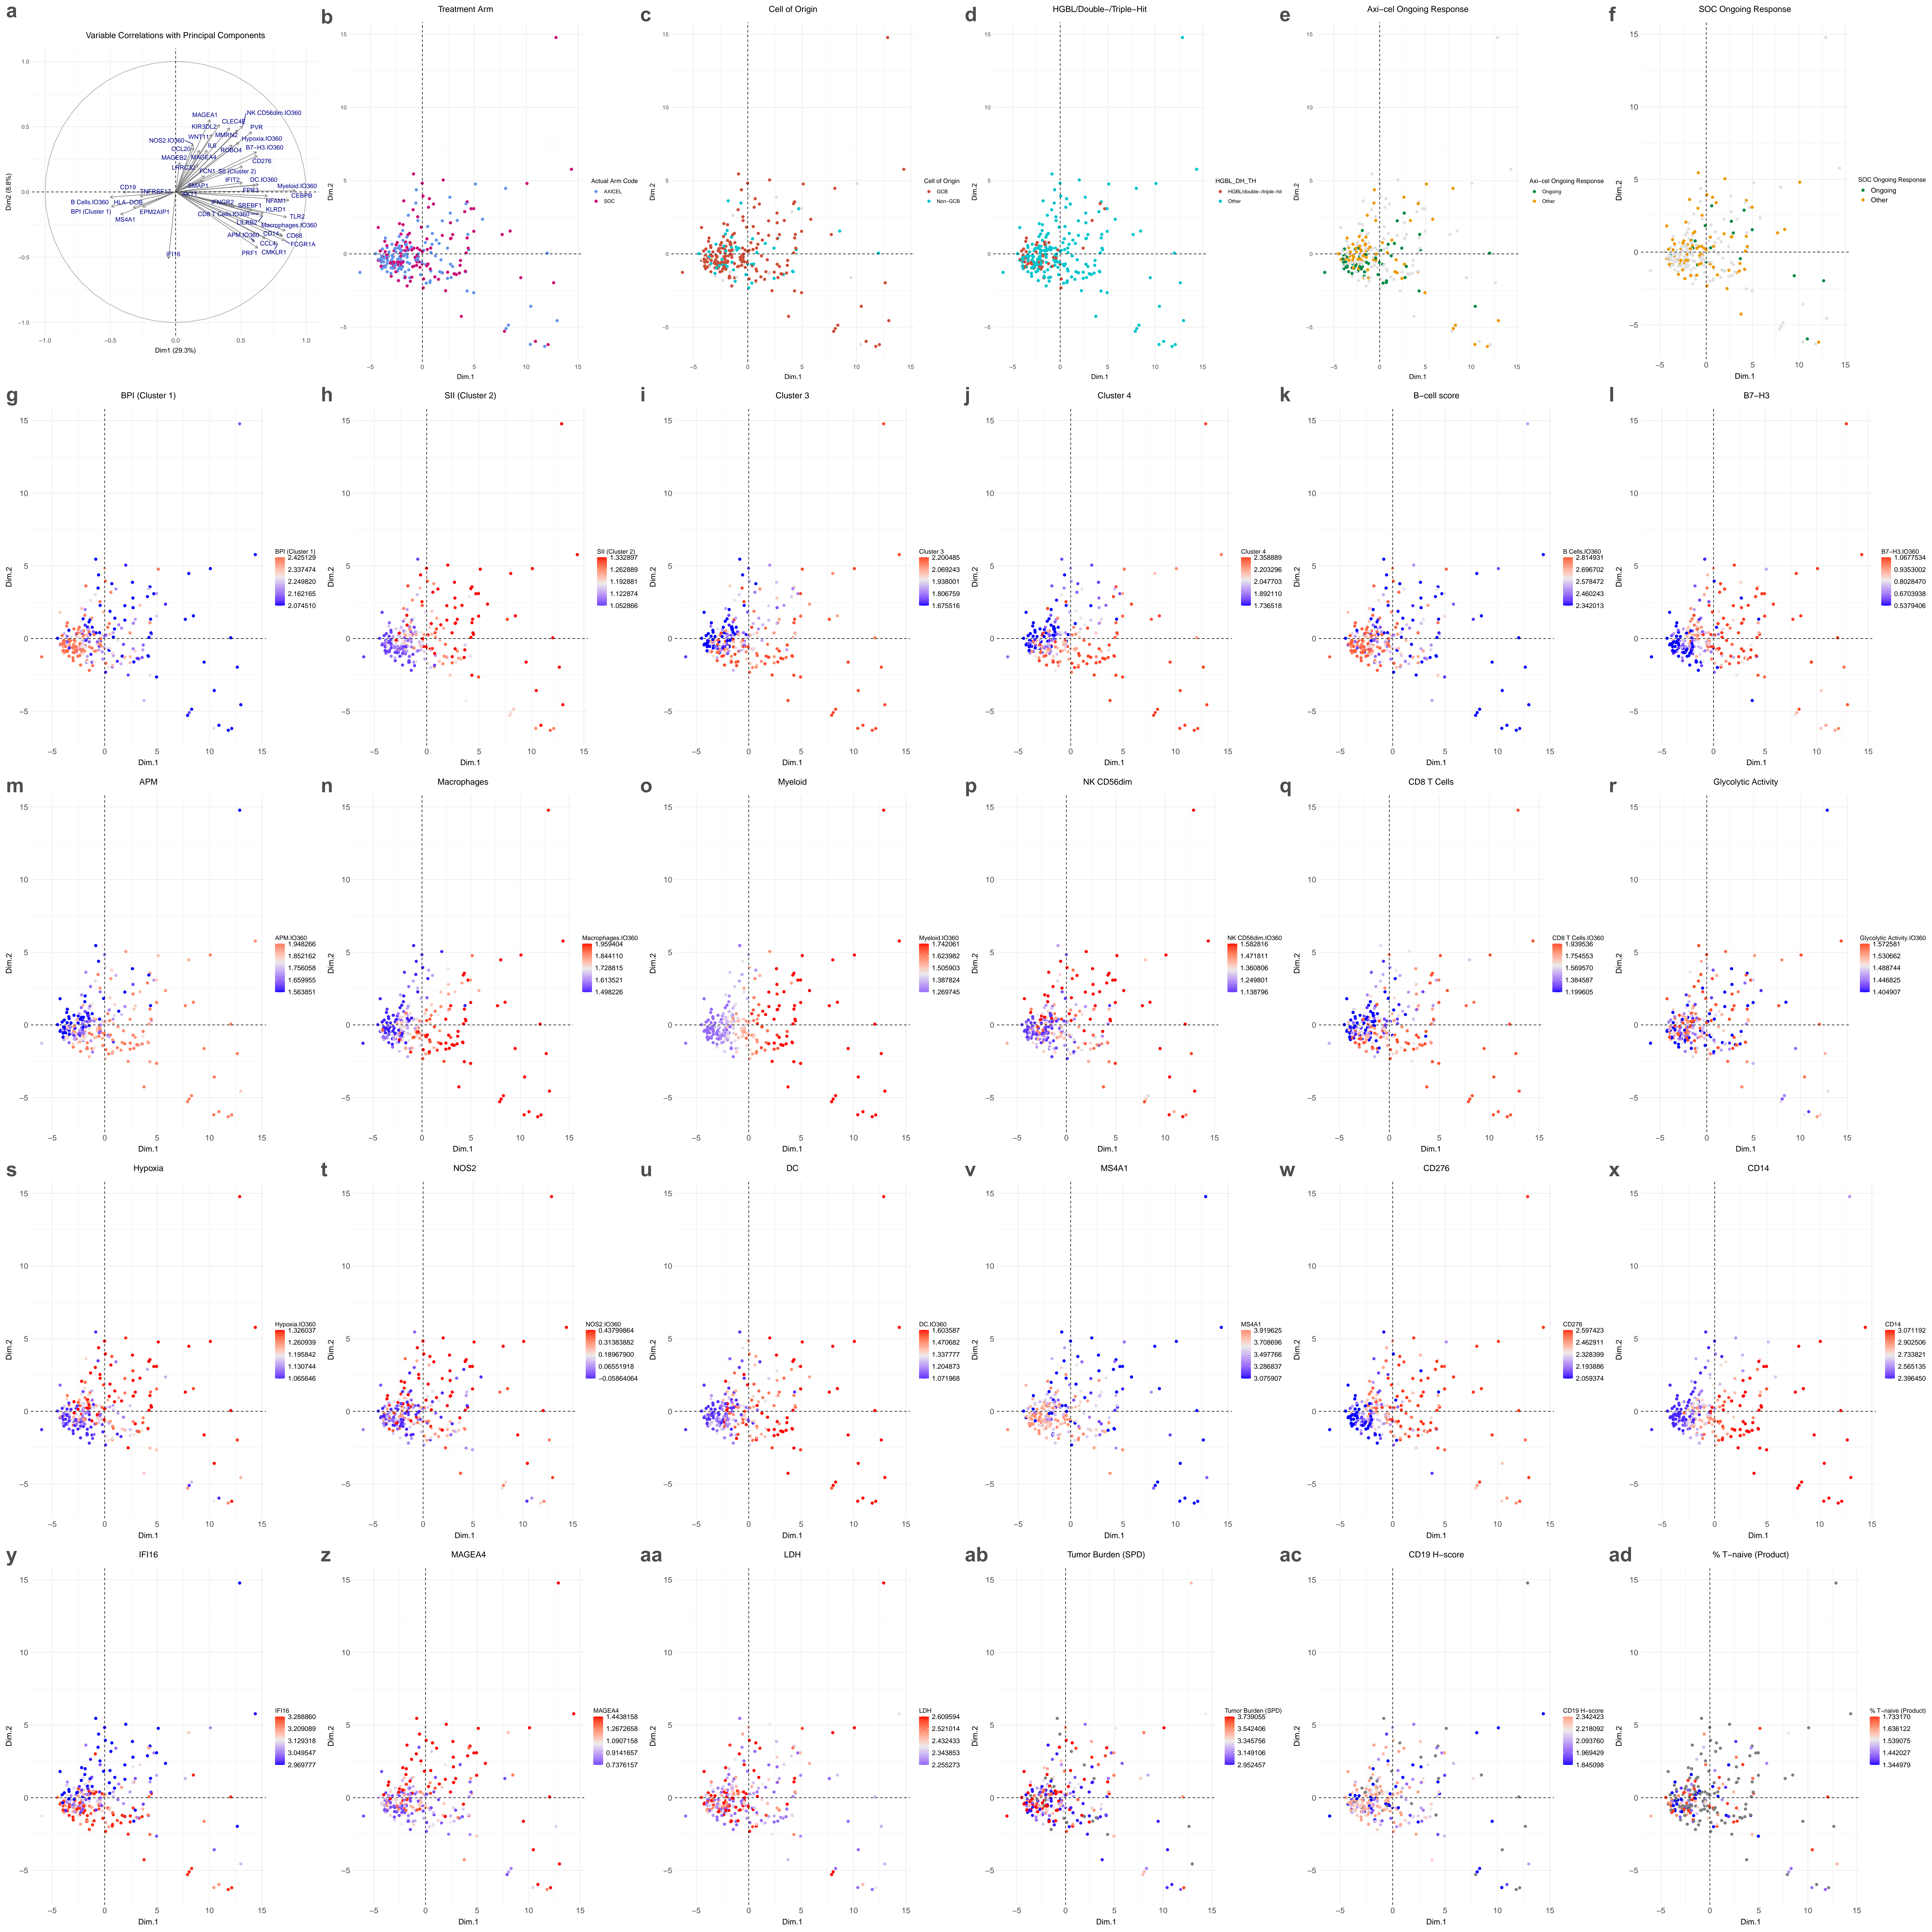

Supplement: 41591_2023_2754_MOESM1_ESM.pdf [file 41591_2023_2754_MOESM1_ESM.pdf]
